# Supplementary material for: Spatiotemporal Variations Dictate Stable and Resilient Microbiome Interactions in the Chesapeake Bay
Source: Research Square preprint supplement (doi:10.21203/rs.3.rs-117419/v1), 2020-12-04
Supplement: Supplementary file 1 [file aa02335ad5fc1f4f90bc399a.docx]

**Supplementary information for**

Spatiotemporal variations dictate stable and resilient microbiome interactions in the Chesapeake Bay

Hualong Wang1,2, Feng Chen2, Chuanlun Zhang3,4,5, Min Wang1, and Jinjun Kan6,7*

1College of Marine Life Sciences, Ocean University of China, Qingdao, China

2Institute of Marine and Environmental Technology, University of Maryland Center for Environmental Science, Baltimore, MD, USA

3Department of Ocean Science and Engineering, Southern University of Science and Technology, Shenzhen, P. R. China

4Shenzhen Key Laboratory of Marine Archaea Geo-Omics, Southern University of Science and Technology, Shenzhen, P. R. China

5Southern Marine Science and Engineering Guangdong Laboratory (Guangzhou), Guangzhou, China

6Microbiology Division, Stroud Water Research Center, Avondale, PA, USA

7Academy for Advanced Interdisciplinary Studies, Southern University of Science and Technology, Shenzhen, P. R. China

* Correspondence: jkan@stroudcenter.org

There are 5 tables and 3 figures in the supplementary information.

**Table S1.** Top 10 nodes based on abundance/degree/betweenness centrality in the network of all samples

**Table S2.** Top 10 nodes with highest abundance/degree/betweenness centrality in each season

**Table S3.** Top 10 nodes with the highest abundance/degree/betweenness centrality in upper Bay and Lower Bay

**Table S4.** Stepwise changes of network properties with removal of top ranked 10 nodes (betweenness centrality)

**Table S5.** Correspondence of microbial groups and environmental factors for structural equation model

**Fig. S1.** Map of the Chesapeake Bay showing sampling stations.

**Fig. S2.** Node connectedness (normalized degree) of microbial networks in each season, as well as the upper Bay and lower Bay.

**Fig. S3.** The multivariate regression tree (MRT) for Chesapeake Bay microbial samples with explanatory variables (environmental data). Red numbers represent the split times, and the variance explained by each split. The black numbers show the average frequency of all taxa in the samples: the total sample number before split.
