# Supplementary material for: Spatiotemporal Variations Dictate Stable and Resilient Microbiome Interactions in the Chesapeake Bay
Source: Research Square preprint supplement (doi:10.21203/rs.3.rs-117419/v1), 2020-12-04
Supplement: Supplementary file 2 [file eb81d3b94f3beb1a77d70205.xlsx]

## Sheet: Table S3
Table S3. Top 10 nodes with the highest abundance/degree/betweenness centrality in upper Bay and lower Bay
	Rank	Upper Bay		Lower Bay
Abundance	1	Alphaproteobacteria, Rhodospirillales, Rhodospirillaceae	0.0675	Cyanobacteria, Oxyphotobacteria, Synechococcales, Cyanobiaceae	0.1064
	2	Gammaproteobacteria, Enterobacteriales, Enterobacteriaceae	0.066	Alphaproteobacteria, Rhodobacterales, Rhodobacteraceae	0.0711
	3	Chloroplast, Mychonastes homosphaera	0.0469	Chloroplast,Others	0.0592
	4	Firmicutes, Bacilli, Lactobacillales	0.0454	Verrucomicrobia, Verrucomicrobiae, Verrucomicrobiales, Rubritaleaceae	0.0519
	5	Dependentiae, Babeliae, Babeliales, uncultured bacterium	0.0358	Alphaproteobacteria, SAR11 clade, Clade I	0.0483
	6	Verrucomicrobia, Verrucomicrobiae, Verrucomicrobiales, DEV007	0.0325	Planctomycetes, Planctomycetacia, Pirellulales, Pirellulaceae	0.0474
	7	Gammaproteobacteria, Aeromonadales, Aeromonadaceae	0.0297	Bacteroidetes, Bacteroidia, Chitinophagales, Saprospiraceae	0.0407
	8	Gammaproteobacteria, Methylococcales, Methylomonaceae	0.0296	Actinobacteria, Actinobacteria, Micrococcales, Microbacteriaceae	0.0386
	9	Proteobacteria, Deltaproteobacteria	0.029	Alphaproteobacteria, SAR11 clade, Clade III	0.0286
	10	Chloroplast, Marsupiomonas pelliculata	0.0222	Actinobacteria, Acidimicrobiia, Actinomarinales, Actinomarinaceae	0.0245
Degree	1	Alphaproteobacteria, Rhodospirillales, AEGEAN-169 marine group	93	Verrucomicrobia, Verrucomicrobiae, Pedosphaerales, Pedosphaeraceae	91
	2	Bacteroidetes, Rhodothermia, Rhodothermales, Rhodothermaceae	93	Planctomycetes, Pla3 lineage, unidentified marine bacterioplankton	90
	3	Verrucomicrobia, Verrucomicrobiae, Opitutales, Puniceicoccaceae	89	Alphaproteobacteria, Rhodospirillales, AEGEAN-169 marine group	89
	4	Gammaproteobacteria, Thiotrichales, Thiotrichaceae	86	Alphaproteobacteria, Rhodospirillales, Rhodospirillaceae	89
	5	Bacteroidetes, Bacteroidia, Flavobacteriales, NS9 marine group	86	Gemmatimonadetes, BD2-11 terrestrial group, uncultured bacterium	86
	6	Archaea, Euryarchaeota, Thermoplasmata, Marine Group II, marine metagenome	84	Gammaproteobacteria, Oceanospirillales, Alcanivoracaceae	85
	7	Archaea, Euryarchaeota, Thermoplasmata, Marine Group II	82	Bacteroidetes, Rhodothermia, Rhodothermales, Rhodothermaceae	84
	8	PAUC34f, uncultured marine bacterium	81	Deltaproteobacteria, SAR324 clade(Marine group B), JCVI-SC AAA005	83
	9	Gammaproteobacteria, SAR86 clade	81	Deltaproteobacteria, Bdellovibrionales, Bdellovibrionaceae	83
	10	Chloroflexi, Dehalococcoidia, SAR202 clade, uncultured bacterium	80	Planctomycetes, OM190	83
Betweeness	1	Gemmatimonadetes, Gemmatimonadetes, Gemmatimonadales, Gemmatimonadaceae	2758	Gammaproteobacteria, Cellvibrionales, Porticoccaceae	1565
	2	Bacteroidetes, Bacteroidia, Sphingobacteriales, NS11-12 marine group	1756	Alphaproteobacteria, Puniceispirillales, SAR116 clade	1470
	3	Gammaproteobacteria, Alteromonadales, Pseudoalteromonadaceae	1663	Planctomycetes, OM190	1392
	4	Alphaproteobacteria, Rhizobiales, Xanthobacteraceae	1505	Planctomycetes, Phycisphaerae, Phycisphaerales, Phycisphaeraceae	1314
	5	Deltaproteobacteria, SAR324 clade(Marine group B), uncultured bacterium	1413	Alphaproteobacteria, Rhizobiales	1190
	6	Betaproteobacteria, SC-I-84	1306	Alphaproteobacteria, Sphingomonadales, Sphingomonadaceae	968
	7	Acidobacteria, Subgroup 6	1295	Patescibacteria, Microgenomatia, Candidatus Pacebacteria	954
	8	Planctomycetes, Planctomycetacia, Planctomycetales, Gimesiaceae	1188	Planctomycetes, OM190, uncultured marine bacterium	942
	9	Firmicutes, Bacilli, Bacillales, Bacillaceae	1178	Cyanobacteria, Melainabacteria, Caenarcaniphilales, uncultured bacterium	925
	10	Bacteroidetes, Bacteroidia, Cytophagales, Microscillaceae	1122	Chloroplast, Phalacroma mitra	923
